# Supplementary material for: Ecuadorian Cancer Patients’ Preference for Information and Communication Technologies: Cross-Sectional Study
Source: PubMed Central journal article supplement (PMC5840480; doi:10.2196/jmir.8485), 2018-02-20
Supplement: jmir_v20i2e50_app1.pdf [file jmir_v20i2e50_app1.pdf]

## Multimedia Appendix 1

Use, obtain information, interest receiving information, and interest in asking a physician through ICT types by education level.

|                                                                                       | No education/       |                       | Undergraduate/           |                   | Total<br>(n= 500) |
|---------------------------------------------------------------------------------------|---------------------|-----------------------|--------------------------|-------------------|-------------------|
|                                                                                       | Primary<br>(n= 205) | Secondary<br>(n= 170) | Postgraduate<br>(n= 125) | P value           |                   |
| Internet access                                                                       | 24.9%               | 39.4%                 | 78.4%                    | .000              | 43.2%             |
| <b><i>Owning</i></b>                                                                  |                     |                       |                          |                   |                   |
| Cellphone                                                                             | 59.5%               | 77.4%                 | 95.2%                    | .000              | 74.5%             |
| Smartphone                                                                            | 81.3%               | 84.1%                 | 67.7%                    | .035              | 75.7%             |
| <b><i>Use of ICT type (at least once a week)</i></b>                                  |                     |                       |                          |                   |                   |
| SMS                                                                                   | 68.6%               | 70.6%                 | 56.6%                    | .128              | 63.8%             |
| Facebook                                                                              | 62.7%               | 75.0%                 | 64.6%                    | .268              | 67.4%             |
| Twitter                                                                               |                     | 4.4%                  | 6.1%                     | .007              | 8.7%              |
| YouTube                                                                               | 54.9%               | 5.9%                  | 43.4%                    | .000              | 34.4%             |
| Email                                                                                 | 33.3%               | 27.9%                 | 48.5%                    | .019              | 38.5%             |
| Internet                                                                              | 60.8%               | 54.4%                 | 63.6%                    | .486              | 60.1%             |
| LinkedIn                                                                              | 11.8%               | 0.0%                  | 0.0%                     | .000 <sup>a</sup> | 2.8%              |
| Skype                                                                                 | 0.0%                | 0.0%                  | 7.1%                     | .019 <sup>a</sup> | 3.2%              |
| WhatsApp                                                                              | 86.3%               | 82.4%                 | 66.7%                    | .010              | 76.1%             |
| Instagram                                                                             | 19.6%               | 17.6%                 | 13.1%                    | .540              | 16.1%             |
| <b><i>Uses ICT to obtain information about disease</i></b>                            |                     |                       |                          |                   |                   |
| Internet                                                                              | 68.6%               | 76.5%                 | 75.8%                    | .566              | 74.3%             |
| Facebook                                                                              | 31.4%               | 13.2%                 | 21.2%                    | .056              | 21.1%             |
| Twitter                                                                               | 21.6%               | 5.9%                  | 7.1%                     | .008              | 10.1%             |
| YouTube                                                                               | 33.3%               | 17.6%                 | 24.2%                    | .142              | 24.3%             |
| Email                                                                                 | 21.6%               | 5.9%                  | 11.1%                    | .031              | 11.9%             |
| WhatsApp                                                                              | 41.2%               | 11.8%                 | 20.2%                    | .001              | 22.5%             |
| Instagram                                                                             | 21.6%               | 5.9%                  | 7.1%                     | .008              | 10.1%             |
| <b><i>Interest in receiving information through ICT type (high/some interest)</i></b> |                     |                       |                          |                   |                   |
| SMS                                                                                   | 51.0%               | 67.6%                 | 61.6%                    | .180              | 61.0%             |

|          |       |       |       |                   |       |
|----------|-------|-------|-------|-------------------|-------|
| Facebook | 39.2% | 51.5% | 31.3% | .032              | 39.4% |
| Twitter  | 23.5% | 4.4%  | 6.1%  | .001              | 9.6%  |
| LinkedIn | 19.6% | 4.4%  | 3.0%  | .002 <sup>a</sup> | 7.3%  |
| Email    | 35.3% | 20.6% | 51.5% | .000              | 38.1% |
| WhatsApp | 82.4% | 75.0% | 52.5% | .000              | 66.5% |

***Interest in asking physician through ICT type (high/some interest)***

|          |       |       |       |                   |       |
|----------|-------|-------|-------|-------------------|-------|
| SMS      | 58.8% | 75.0% | 58.6% | .067              | 63.8% |
| Facebook | 35.3% | 32.4% | 33.3% | .944              | 33.5% |
| Twitter  | 23.5% | 0.0%  | 6.1%  | .000              | 8.3%  |
| LinkedIn | 7.8%  | 0.0%  | 0.0%  | .003 <sup>a</sup> | 1.8%  |
| Email    | 39.2% | 29.4% | 47.5% | .064              | 39.9% |
| WhatsApp | 86.3% | 82.4% | 57.6% | .000              | 72.0% |

---

Notes: All data are presented as percentages. Differences in values between the three education level groups are significant at .05 significance level
