# Supplementary material for: Ecuadorian Cancer Patients’ Preference for Information and Communication Technologies: Cross-Sectional Study
Source: PubMed Central journal article supplement (PMC5840480; doi:10.2196/jmir.8485), 2018-02-20
Supplement: jmir_v20i2e50_app2.pdf [file jmir_v20i2e50_app2.pdf]

## Multimedia Appendix 2

Use, obtain information, interest receiving information, and interest in asking a physician through ICT types by years with cancer.

|                                                                                       | < 3 years<br>(n= 386) | ≥ 3 years<br>(n= 110) | P value           | Total<br>(n= 496) |
|---------------------------------------------------------------------------------------|-----------------------|-----------------------|-------------------|-------------------|
| Internet                                                                              | 45.3%                 | 34.5%                 | .044              | 42.9%             |
| <b><i>Owning</i></b>                                                                  |                       |                       |                   |                   |
| Cellphone                                                                             | 77.6%                 | 62.7%                 | .002              | 74.3%             |
| Smartphone                                                                            | 74.3%                 | 80.6%                 | .450              | 75.2%             |
| <b><i>Use of ICT type (at least once a week)</i></b>                                  |                       |                       |                   |                   |
| SMS                                                                                   | 65.7%                 | 61.5%                 | .621              | 65.0%             |
| Facebook                                                                              | 70.9%                 | 59.0%                 | .148              | 68.7%             |
| Twitter                                                                               | 5.7%                  | 23.1%                 | .002 <sup>a</sup> | 8.9%              |
| YouTube                                                                               | 36.6%                 | 28.2%                 | .322              | 35.0%             |
| Email                                                                                 | 34.3%                 | 51.3%                 | .047              | 37.4%             |
| Internet                                                                              | 62.3%                 | 46.2%                 | .064              | 59.3%             |
| LinkedIn                                                                              | 3.4%                  | 0.0%                  | .595 <sup>a</sup> | 2.8%              |
| Skype                                                                                 | 2.3%                  | 7.7%                  | .116 <sup>a</sup> | 3.3%              |
| WhatsApp                                                                              | 73.7%                 | 94.9%                 | .004              | 77.6%             |
| Instagram                                                                             | 16.6%                 | 15.4%                 | .856              | 16.4%             |
| <b><i>Uses ICT to obtain information about disease</i></b>                            |                       |                       |                   |                   |
| Internet                                                                              | 77.7%                 | 56.4%                 | .006              | 73.8%             |
| Facebook                                                                              | 18.9%                 | 23.1%                 | .548              | 19.6%             |
| Twitter                                                                               | 5.1%                  | 23.1%                 | .001 <sup>a</sup> | 8.4%              |
| YouTube                                                                               | 21.1%                 | 30.8%                 | .196              | 22.9%             |
| Email                                                                                 | 7.4%                  | 23.1%                 | .007 <sup>a</sup> | 10.3%             |
| WhatsApp                                                                              | 17.1%                 | 38.5%                 | .003              | 21.0%             |
| Instagram                                                                             | 5.1%                  | 23.1%                 | .001 <sup>a</sup> | 8.4%              |
| <b><i>Interest in receiving information through ICT type (high/some interest)</i></b> |                       |                       |                   |                   |
| SMS                                                                                   | 64.6%                 | 51.3%                 | .122              | 62.1%             |
| Facebook                                                                              | 43.4%                 | 25.6%                 | .040              | 40.2%             |

|          |       |       |                   |       |
|----------|-------|-------|-------------------|-------|
| Twitter  | 6.9%  | 23.1% | .005 <sup>a</sup> | 9.8%  |
| LinkedIn | 5.1%  | 17.9% | .013 <sup>a</sup> | 7.5%  |
| Email    | 40.0% | 23.1% | .048              | 36.9% |
| WhatsApp | 64.6% | 82.1% | .035              | 67.8% |

***Interest in asking physician through ICT type (high/some interest)***

|          |       |       |                   |       |
|----------|-------|-------|-------------------|-------|
| SMS      | 68.6% | 48.7% | .019              | 65.0% |
| Facebook | 36.6% | 23.1% | .108              | 34.1% |
| Twitter  | 5.1%  | 23.1% | .001 <sup>a</sup> | 8.4%  |
| LinkedIn | 0.0%  | 10.3% | .001 <sup>a</sup> | 1.9%  |
| Email    | 40.6% | 41.0% | .958              | 40.7% |
| WhatsApp | 76.0% | 61.5% | .065              | 73.4% |

---

Notes: All data are presented as percentages. Differences in values between the two “years with cancer” groups are significant at .05 significance level
