# Supplementary material for: Ecuadorian Cancer Patients’ Preference for Information and Communication Technologies: Cross-Sectional Study
Source: PubMed Central journal article supplement (PMC5840480; doi:10.2196/jmir.8485), 2018-02-20
Supplement: jmir_v20i2e50_app3.pdf [file jmir_v20i2e50_app3.pdf]

### Multimedia Appendix 3

Use, obtain information, interest receiving information, and interest in asking a physician through ICT types by gender.

|                                                                                       | Male<br>(n=111) | Females<br>(n=389) | P value           | Total<br>(n=500) |
|---------------------------------------------------------------------------------------|-----------------|--------------------|-------------------|------------------|
| Internet                                                                              | 45.9%           | 42.4%              | .516 <sup>a</sup> | 43.2%            |
| <b><i>Owning</i></b>                                                                  |                 |                    |                   |                  |
| Cellphone                                                                             | 64.9%           | 77.3%              | .010 <sup>a</sup> | 74.5%            |
| Smartphone                                                                            | 60.8%           | 80.5%              | .008 <sup>a</sup> | 75.7%            |
| <b><i>Use of ICT type (at least once a week)</i></b>                                  |                 |                    |                   |                  |
| SMS                                                                                   | 66.7%           | 62.9%              | .740 <sup>a</sup> | 63.8%            |
| Facebook                                                                              | 52.9%           | 71.9%              | .016 <sup>a</sup> | 67.4%            |
| Twitter                                                                               | 3.9%            | 10.2%              | .256 <sup>a</sup> | 8.7%             |
| YouTube                                                                               | 35.3%           | 34.1%              | .868 <sup>a</sup> | 34.4%            |
| Email                                                                                 | 51.0%           | 34.7%              | .048 <sup>a</sup> | 38.5%            |
| Internet                                                                              | 62.7%           | 59.3%              | .745 <sup>a</sup> | 60.1%            |
| LinkedIn                                                                              | 0.0%            | 3.6%               | .340 <sup>a</sup> | 2.8%             |
| Skype                                                                                 | 0.0%            | 4.2%               | .204 <sup>a</sup> | 3.2%             |
| WhatsApp                                                                              | 74.5%           | 76.6%              | .851 <sup>a</sup> | 76.1%            |
| Instagram                                                                             | 19.6%           | 15.0%              | .513 <sup>a</sup> | 16.1%            |
| <b><i>Uses ICT to obtain information about disease</i></b>                            |                 |                    |                   |                  |
| Internet                                                                              | 80.4%           | 72.5%              | .279 <sup>a</sup> | 74.3%            |
| Facebook                                                                              | 37.3%           | 16.2%              | .003 <sup>a</sup> | 21.1%            |
| Twitter                                                                               | 17.6%           | 7.8%               | .060 <sup>a</sup> | 10.1%            |
| YouTube                                                                               | 41.2%           | 19.2%              | .003 <sup>a</sup> | 24.3%            |
| Email                                                                                 | 25.5%           | 7.8%               | .002 <sup>a</sup> | 11.9%            |
| WhatsApp                                                                              | 25.5%           | 21.6%              | .568 <sup>a</sup> | 22.5%            |
| Instagram                                                                             | 17.6%           | 7.8%               | .060 <sup>a</sup> | 10.1%            |
| <b><i>Interest in receiving information through ICT type (high/some interest)</i></b> |                 |                    |                   |                  |
| SMS                                                                                   | 74.5%           | 56.9%              | .032 <sup>a</sup> | 61.0%            |
| Facebook                                                                              | 43.1%           | 38.3%              | .624 <sup>a</sup> | 39.4%            |

|          |       |       |                   |       |
|----------|-------|-------|-------------------|-------|
| Twitter  | 3.9%  | 11.4% | .173 <sup>a</sup> | 9.6%  |
| LinkedIn | 0.0%  | 9.6%  | .026 <sup>a</sup> | 7.3%  |
| Email    | 66.7% | 29.3% | .000 <sup>a</sup> | 38.1% |
| WhatsApp | 74.5% | 64.1% | .180 <sup>a</sup> | 66.5% |

***Interest in asking physician through ICT type (high/some interest)***

|          |       |       |                   |       |
|----------|-------|-------|-------------------|-------|
| SMS      | 78.4% | 59.3% | .013 <sup>a</sup> | 63.8% |
| Facebook | 39.2% | 31.7% | .397 <sup>a</sup> | 33.5% |
| Twitter  | 3.9%  | 9.6%  | .255 <sup>a</sup> | 8.3%  |
| LinkedIn | 0.0%  | 2.4%  | .575 <sup>a</sup> | 1.8%  |
| Email    | 47.1% | 37.7% | .255 <sup>a</sup> | 39.9% |
| WhatsApp | 70.6% | 72.5% | .859 <sup>a</sup> | 72.0% |

---

Notes: All data are presented as percentages. Differences in values between the two gender groups are significant at .05 significance level
